# Supplementary material for: STAT3 Suppresses Cardiomyocytes Apoptosis in CVB3-Induced Myocarditis Via Survivin
Source: Front Pharmacol. 2021 Jan 25;11:613883. doi: 10.3389/fphar.2020.613883 (PMC7919905; doi:10.3389/fphar.2020.613883)
Supplement: Supplementary file 2 [file DataSheet1.xlsx]

## Sheet: Sheet1
Figure 1 statistical data
group/index	Day 0	Day 3	Day 5	Day 7
Cardiac pathological scores	0	0.8	1.2	1.4
Cardiac pathological scores	0	0.8	1.2	1.8
Cardiac pathological scores	0	1	1.2	1.2
Cardiac pathological scores	0	0.6	1	2
Ratio of p-STAT3/STAT3	0.279829	0.56438	0.843223	0.956047
Ratio of p-STAT3/STAT3	0.190332	0.600471	0.935513	1.13865
Ratio of p-STAT3/STAT3	0.231973	0.431322	0.884425	1.02867
Ratio of p-STAT3/STAT3	0.224118	0.435154	0.842213	0.936677
survivin protein expression	0.193863	0.49705	0.854628	1.27553
survivin protein expression	0.189795	0.456431	0.788036	1.33833
survivin protein expression	0.259164	0.454373	0.831238	1.04607
survivin protein expression	0.056301	0.340952	0.838176	1.01644
