# Supplementary material for: STAT3 Suppresses Cardiomyocytes Apoptosis in CVB3-Induced Myocarditis Via Survivin
Source: Front Pharmacol. 2021 Jan 25;11:613883. doi: 10.3389/fphar.2020.613883 (PMC7919905; doi:10.3389/fphar.2020.613883)
Supplement: Supplementary file 3 [file DataSheet2.xlsx]

## Sheet: Sheet1
Figure 2 statistical data
group/index	0h	12h	24h	48h
Ratio of p-STAT3/STAT3	0.339899	0.685523	1.105	0.974453
Ratio of p-STAT3/STAT3	0.344867	0.864289	1.04407	0.750634
Ratio of p-STAT3/STAT3	0.424858	0.510611	1.34228	0.677731
Ratio of p-STAT3/STAT3	0.315521	0.625787	1.48464	0.632994
survivin protein expression	0.208225	0.677282	0.807145	0.718677
survivin protein expression	0.20962	0.545905	1.07174	0.800639
survivin protein expression	0.211681	0.770372	1.00443	0.875665
survivin protein expression	0.154893	0.474332	0.908234	0.710264
